# Supplementary material
Source: publisher site journal article supplement (https://www.spandidos-publications.com/8432/downloadSupplementary)
Supplement: Supplementary file 1 [file downloadSupplementary]

**Table SI.** Primer sequences used for quantitative PCR.

| Gene name | Sequence (5'-3')           |
|-----------|----------------------------|
| GADPH     | F: GTCTCCTCTGACTTCAACAGCG  |
|           | R: ACCACCCTGTTGCTGTAGCCAA  |
| BUD23     | F: GCATCCGAGGCCACCAGAC     |
|           | R: TGTGCCGCTCCTTCTTCTCC    |
| TAF6      | F: CGGCAAAGGGAAAGAGAAGAAGG |
|           | R: GCTGCTGCTCCACAGACAAC    |
| POLR2J    | F: TGCTATTGCTGGCTACAAAGTCC |
|           | R: AGGTCGGTGATGGCGTTGG     |
| RFC2      | F: GGATGAAGCAGACAGCATGACC  |
|           | R: AGCATTACAAGCAAGGGCGAAG  |
| VPS37D    | F: CTAGAAGAGGCGGAGCAGGAG   |
|           | R: CTGGAAGGCAGGCAGGAAGG    |

F, forward; R, reverse; TAF6, TATA-box binding protein associated factor 6; POLR2J, RNA polymerase II subunit J; RFC2, replication factor C subunit 2; VPS37D, vacuolar protein sorting-associated protein 37D.
